1 Facing the green threat: A waterflea's defenses against a carnivorous  
2 plant

3 Short title: Facing the green threat

4 Sebastian Kruppert<sup>1,2\*</sup>, Martin Horstmann<sup>1</sup>, Linda C. Weiss<sup>1</sup>, Elena Barmaeva<sup>1</sup>, Nadja Kubitzka<sup>1</sup>,  
5 Simon Poppinga<sup>3,4</sup>, Anna S. Westermeier<sup>3,5</sup>, Thomas Speck<sup>3,4,5</sup>, Ralph Tollrian<sup>1</sup>

6 <sup>1</sup>Department of Animal Ecology, Evolution & Biodiversity, Ruhr-University Bochum, Germany.

7 <sup>2</sup>Friday Harbor Laboratories, University of Washington, WA, USA.

8 <sup>3</sup>Plant Biomechanics Group, Botanic Garden, University of Freiburg, Freiburg im Breisgau,  
9 Germany.

10 <sup>4</sup>Freiburg Materials Research Center (FMF), University of Freiburg, Freiburg im Breisgau,  
11 Germany.

12 <sup>5</sup>Freiburg Center for Interactive Materials and Bioinspired Technologies (FIT), University of  
13 Freiburg, Freiburg im Breisgau, Germany.

14 \*corresponding author: Sebastian Kruppert

15 **Email:** [sebastian.kruppert@rub.de](mailto:sebastian.kruppert@rub.de)

16 **Mail Address:** Universitätsstrasse 150, 44801 Bochum, Room NDEF 05/753

17 **phone:** +49 234/32-25577

18 Open Research Statement: Data is not finally prepared for upload yet. Once most fitting file types  
19 are determined and metadata is created we aim to upload all raw data as supporting information.

## 20 Abstract

21 Water fleas of the family Daphniidae are keystone species in many lentic ecosystems and,  
22 as most abundant filter feeders, link the primary production to higher trophic levels. As a  
23 response to the high predatory pressures, water fleas have evolved a range of defenses,  
24 including inducible defenses against animal predators. Here we show in *Ceriodaphnia*  
25 *dubia* a first example of such defenses induced by the presence of a coexisting plant  
26 predator, i.e. the carnivorous southern bladderwort (*Utricularia australis*,  
27 Lentibulariaceae), which possesses ultrafast underwater suction traps. When the  
28 bladderwort is present, *C. dubia* shows changes in morphology, life-history and behavior.  
29 While the morphological and behavioral adaptations improve *C. dubia*'s survival rate in  
30 the presence of this predator, the life-history parameters likely reflect trade-offs for the  
31 defense. Our study demonstrates plant-induced animal defenses, implying their potential  
32 relevance in freshwater ecosystems and contributing to an overall yet underestimated  
33 biodiversity of inducible defenses.

34 **Keywords:** Daphnia, inducible defenses, carnivorous plant.

## 35 Background

36 Members of the crustacean family Daphniidae represent some of the most abundant zooplankters  
37 in lentic freshwater ecosystems (1). As consumers of phytoplankton, they link primary production  
38 to higher trophic levels by falling prey to a variety of predators like other crustaceans, fish or

39 insects (2,3). This seasonally high but variable predation risk favored the evolution of inducible  
40 defenses in some species of the Daphniidae. Inducible defenses are a form of phenotypic plasticity  
41 that decreases an organism's vulnerability to specific predators (for reviews see Tollrian & Harvell  
42 1999; Weiss *et al.* 2012; Weiss & Tollrian 2018; Riessen & Gilbert 2019). These defenses range  
43 from alterations in morphology, or life history parameters to behavior. Many defenses are predator-  
44 specific and adapted to counter the respective predator. For example, a vast diversity of striking  
45 morphological defenses has been described. They include rather minute structures like 'neckteeth'  
46 expressed by *Daphnia pulex* (8–10) and the medium sized 'crown of thorns' in *D. atkinsoni* (11)  
47 or large morphological changes like the helmets of *D. cucullata* and *D. lumholtzi* (12,13) and the  
48 crests of *D. longicephala* (14–16). Further, alterations in the carapace architecture and its  
49 mechanical properties have been reported (17–19). In the presence of visual hunters like fish, some  
50 *Daphnia* species alter their life history and shift resources from somatic growth to reproduction  
51 (20,21). Species of *Daphnia* predated by invertebrates display the opposite strategy by accelerating  
52 their somatic growth. This way prey overcomes the predator's gape limit, at the expense of  
53 population growth rate (22–25). A well-studied behavioral defense strategy is the diel vertical  
54 migration of zooplankton. Here, *Daphnia* avoid visual predators by residing in deeper waters  
55 during the day and ascent into shallow nutrient-rich strata for grazing during the night when these  
56 predators are hampered by low light levels (26). Also, changes in swimming behavior have been  
57 reported, like predator-induced increase or decrease in individual swimming speed (for a review  
58 see Langer *et al.* 2019).

59 Existing literature on inducible defenses in Daphniidae focusses on responses against animal  
60 predators overlooking carnivorous plants. One exception is a study by Havel and Dodson (28) that  
61 included *Utricularia* spec. but observed no induction of morphological defenses in *D. retrocurva*.  
62 The southern bladderwort (*Utricularia australis*), native to Central Europe, is a naturally  
63 coexisting predator of many different *Daphnia* species including *Ceriodaphnia dubia* (29–31).  
64 With its ultrafast suction traps, it can catch prey within ~5 ms, leaving little escape chances (32).  
65 Water is actively pumped out of the trap lumen via specialized glands (33), creating sub-ambient  
66 pressure inside the trap (34–36). If triggered, *C. dubia* is sucked into the trap with a speed of up to  
67 4 m/s (32). The trap resets in about 15-30 min after suction and continues to catch further prey  
68 until the trap is full. With the help of these highly efficient traps the plant acquires a substantial  
69 nutrient supply (32,36–38). According to their spatial dimensions, many species within the  
70 Daphniidae family fit into the suction traps and are therefore potential prey (39). In combination  
71 with seasonally high abundances of *U. australis*, and due to the fact that each plant can possess  
72 several hundreds to thousands of traps, it may pose a severe threat on daphniid populations (31).  
73 In fact, trap content analysis prove Daphniidae to be a substantial portion of the southern  
74 bladderwort's prey spectrum (32). In this context, we hypothesized that *Daphnia* may have  
75 evolved mechanisms reducing this predation pressure.

76 Using high-resolution 3D morphometrics (40), we investigated morphological changes in *C. dubia*  
77 as adaptive responses to the presence of *U. australis*. Additionally, we analyzed life history shifts  
78 and behavioral alterations as a possible response of *C. dubia* to the plant's presence. Furthermore,

79 we analyzed the bladderwort's capture efficiency for control and exposed (defense-induced)  
80 *C. dubia* in order to determine the protective effect of the displayed defensive strategies.

## 81 Materials and Methods

### 82 Study Design

83 In order to depict a naturally occurring predator-prey system we started this study by identifying  
84 local ponds containing *U. australis* alongside several Daphniidae species in the field. We  
85 subsequently performed a trap analysis to validate the co-occurring Daphniidae species as prey  
86 items of *U. australis*. From the resulting prey spectrum analysis (32) we chose *C. dubia* as our  
87 candidate for the present study due to its high abundance in the pond as well as in the *U. australis*  
88 traps. For validating our initial hypothesis that *C. dubia* has evolved inducible defenses against the  
89 coexisting bladderwort (*U. australis*), we adjusted controlled laboratory experiments initially  
90 developed for animal predators (e.g. Tollrian 1990, 1994; Weiss *et al.* 2016; Kruppert *et al.* 2017;  
91 Poppinga *et al.* 2017). Based on our experience with Daphniidae and their inducible defenses, we  
92 aimed for a sample size of 10 specimens for each experiment, as we expected any alterations to be  
93 detectable with this sample size (e.g. Tollrian 1990; Kruppert *et al.* 2016, 2017; Weiss *et al.* 2016;  
94 Horstmann *et al.* 2018). The first experiment was designed to verify whether *C. dubia* reacts on  
95 the presence of *U. australis* with alterations in morphology and life history. Using light  
96 microscopy, we measured morphometric (body length and body width) as well as life history  
97 parameters (number of egg-carrying females, clutch size) of initially juvenile *C. dubia* specimen  
98 in four different treatments (tap water control, non-threatening plant, fed *Utricularia*, unfed

99 *Utricularia*) over a duration of 6 days. Based on the initial findings, we conducted follow-up  
100 experiments in order to identify behavioral alterations as well as to validate the alterations as being  
101 an effective defense to the bladderwort traps. All experiments are described in detail below. We  
102 did not exclude any data from the analysis and outliers were not predefined or treated differently  
103 in the analysis. Randomization, where conducted, was used to prevent influence of external factors  
104 (i.e. illumination) and no specific method for randomization was applied. Our study does not  
105 include any mode of blinding.

#### 106 Sampling of *C. dubia*

107 *C. dubia* individuals coexisting with *U. australis* in a fish-free, artificial pond complex in  
108 Gelsenkirchen, Germany (51°30'17.9"N 7°04'58.7"E) were sampled October 1<sup>st</sup>, 2015 and brought  
109 immediately to the lab for culturing.

#### 110 Cultures

##### 111 Prey crustaceans (*Ceriodaphnia dubia*)

112 From the Gelsenkirchen pond samples, a clonal line of *C. dubia* (S04) was reared from a single  
113 female. This female and the subsequent offspring were cultured in 1 L beakers (J. Weck GmbH &  
114 Co. KG, Wehr-Öflingen, Germany) containing charcoal-filtered tap-water. A maximum of 100  
115 animals was kept in the beakers by transferring supernumerary adults and neonates into new  
116 beakers. The beakers were regularly cleared of detritus, half of the water was exchanged monthly  
117 and *Acutodesmus obliquus* was added as food source *ad libitum*. The cultures were kept under  
118 stable conditions at 20°C +/- 1°C and a 16 h:8 h light to dark cycle.

119 Predator (the carnivorous plant *Utricularia australis*)

120 We used *U. australis* cultivated and used in prior experiments at the Botanical Garden of the  
121 University of Freiburg. The plants were cultivated in the Department of Animal Ecology,  
122 Evolution and Biodiversity of the Ruhr-University Bochum, Germany. Plants were kept in 50 L  
123 plastic aquaria filled with charcoal-filtered tap-water and positioned 60 cm beneath a light source  
124 consisting of four fluorescent tube lamps with 36 W each (Radium NL 36 W/840 Spectralux Plus  
125 cool white). The *U. australis* culture was kept under the same stable conditions as the *C. dubia*  
126 culture (at 20 °C +/- 1 °C and a 16 h:8 h light to dark cycle), and the plants were constantly growing  
127 and continuously producing new traps.

128 Trap entrance dimensions

129 To measure the predator's gape size, twenty *U. australis* traps were dissected from the plant and  
130 imaged using a stereomicroscope (Olympus SZX16) with a digital camera (ColorView III digital  
131 imaging system) attached. The widths and heights of the trap entrances were measured via imaging  
132 software (Cell^D; Soft Imaging Solutions, SIS Olympus, Münster, Germany). As trap entrance  
133 width, we defined the shortest distance between opposite trap entrance walls, parallel to the  
134 threshold of the trap entrance margin (42). The height of the trap entrance is the line connecting  
135 threshold and trap door insertion and is therefore orthogonal to the width.

136 Defense induction

137 In order to investigate *U. australis*-induced morphological and life-history defenses in *C. dubia*,  
138 we analyzed individuals from the earliest juvenile stages. To do so, we started the experiments

139 with egg-carrying individuals in the last embryonic stage and measured the offspring individually  
140 every 24 hours throughout the following 6 days. We chose this ontogenetic stage because *Daphnia*  
141 is sensitive to predatory cues from the fourth embryonic stage onward (10). We conducted the  
142 experiment in a full factorial design consisting of four different treatments (n=10 each). We used  
143 two different treatments in order to control for the absence of plants ('tap water control') as well  
144 as for the presence of non-threatening plants by exposing *C. dubia* to an equal amount of coontails  
145 (*Ceratophyllum demersum*) as we used *U. australis* in the experimental treatments (see below)  
146 ('*Ceratophyllum* control'). Coontails naturally occur together with *U. australis* (43) and *C. dubia*.  
147 As experimental treatments we conducted two induction setups where *C. dubia* was confronted  
148 with *U. australis*. In order to identify whether the biological activity is solely plant borne, we  
149 reared *C. dubia* together with bladderworts as one experimental treatment ('unfed *Utricularia*').  
150 In addition, we performed an experimental treatment in which *C. dubia* was exposed to  
151 bladderwort that were fed daily with 25 juvenile *C. dubia* ('fed *Utricularia*'), as inducing agents  
152 are often associated with active feeding processes (44,45). All treatments were conducted in 1 L  
153 beakers (J. Weck GmbH & Co. KG, Wehr-Öflingen, Germany). To avoid direct predator contact  
154 and prevent the consumption of the test specimens in both predator treatments, we separated prey  
155 (*C. dubia*) and predator (*U. australis*) using net cages equipped with fine mesh widths of 125 µm  
156 (Hydrobios, Germany). Within the net cages, we placed the egg carrying *C. dubia* females. Plants  
157 (one shoot of 10-15 cm each) were placed outside the net cages and, depending on the treatment,  
158 were fed daily with 25 juvenile *C. dubia* ('fed *Utricularia*') or left unfed.



159 Analysis of morphology and life history alterations

160 Once *C. dubia* females released their brood (i.e. approximately within 24 h), we removed the  
161 mothers leaving only the offspring in the net cages. Another 24 h later, we started to image the  
162 animals in a daily rhythm for 6 days in total by using a stereomicroscope (Olympus SZX16)  
163 equipped with a digital camera (ColorView III digital imaging system) and imaging software  
164 (Cell^D; Soft Imaging Solutions, SIS Olympus, Münster, Germany). We measured the following  
165 parameters in order to identify morphological and life-history alterations (see S-Table 1, 2 and 5):  
166 body length, body width, the number of egg carrying females and the average number of eggs  
167 deposited in the brood pouch. The body length was measured from the top of the compound eye  
168 to the point where the carapace converges into the tail-spine. Body width was measured at the  
169 broadest distance between ventral and dorsal perpendicular to the body length. In order to analyze  
170 the body width allometrically, we normalized it to the body length (normalized body width = body  
171 width/body length).

172 3D analysis of morphological alterations

173 In order to identify morphological alterations comprehensively, we conducted a three-dimensional  
174 analysis of control and plant-exposed *C. dubia* as described by Horstmann et al. (40). For that, we  
175 used *C. dubia* (n(control)=13; n(induced)=8) individuals from the ‘fed *Utricularia*’ treatment on  
176 day 5 of the experimental period. The animals were stained using Congo red, scanned on a confocal  
177 laser scanning microscope and subsequently digitized as a surface image. These surface images

178 were analyzed using a landmark based method ( $\approx 45,000$  semi-landmarks per animal) and  
179 compared using a Procrustes-based analysis. For details please see Horstmann et al. 2018 (40).

## 180 Analysis of behavioral defenses

### 181 Predator avoidance

182 We conducted a subsequent experiment that aimed to identify behavioral changes in *C. dubia* as a  
183 response to the presence of *U. australis*. We designed this experiment in order to test whether  
184 *C. dubia* avoids areas that are shadowed by plants based in dependence of their stage of alertness  
185 (either naïve or alerted by prior predator exposure). We used five different setups resulting from  
186 the combination of two different control treatments ('control' and 'fed *Utricularia*') and three  
187 different experimental scenarios ('no plant', '*Elodea*' and '*Utricularia*'). The combination 'fed  
188 *Utricularia*' / 'no plant' was not included in our experiments. As specimens, we used five-day-old  
189 *C. dubia* that were either reared in 'control' or in 'fed *Utricularia*' beakers. The 'no plant' scenario  
190 with 'control' animals was used as behavioral baseline ('tap water control'). Avoidance behavior  
191 of the two treatments was tested in the two environmental scenarios; a control condition with the  
192 non-carnivorous plant *Elodea canadensis* and a test treatment with the carnivorous plant *U.*  
193 *australis*. We wanted to test for external factors affecting behavior (e.g. inhomogeneous light  
194 conditions, as a result of plant associated shading) and used exposure to *Elodea canadensis* as a  
195 comparison to the control condition without any plants because *E. canadensis* shows strong  
196 similarity to *U. australis* in terms of shadowing. Their color and whorl morphology give them an  
197 *Utricularia*-like appearance. The plant treatments were conducted using a single shoot of

198 *U. australis* or *E. canadensis* respectively. For each treatment, we placed 20 five-day-old *C. dubia*  
199 in 2 L plastic tanks (ca. 18 cm x 13 cm x 11.5 cm, Savic, Kortrijk, Belgium) filled with charcoal-  
200 filtered tap-water and according to the experimental condition, *U. australis* or *E. canadensis*  
201 randomly positioned on either side of the tank. The plants were kept on one side of the tank with  
202 a spacer positioned centrally in the respective tank, fixing the floating plants. All five different  
203 experimental setups ('tap water control', 'control vs. *Elodea*', 'fed *Utricularia* vs. *Elodea*',  
204 'control vs. *Utricularia*', 'fed *Utricularia* vs. *Utricularia*') were started simultaneously and  
205 monitored in parallel. The experiment was repeated 10 times. For documentation of the animals'  
206 positions, the tanks were divided into 18 equally sized sections (each approx. 3x4.3 cm) by  
207 superimposing a grid with three rows and six columns on the tanks' fronts. Three of these columns  
208 did not contain plants, three columns contained plants. For homogenous light conditions and to  
209 avoid light reflections, we installed a single fluorescent tube lamp above each tank, (fluorescent  
210 tube lamp, Radium NL 36 W/840 Spectralux Plus cool white). This setup provided uniform light  
211 over the whole surface and prevented shadows. Furthermore, the treatments were randomly  
212 permuted between the tanks in order to exclude position-dependent effects (e.g. whether there  
213 were neighbouring tanks or not). We started the experiment by introducing the 20 five-day-old  
214 *C. dubia* after acclimation for 30 min to the new environment as used in comparable studies  
215 (27,46). We manually documented the distribution pattern of *C. dubia* in the sections of the tank  
216 every 15 minutes for a total duration of 60 minutes resulting in 5 measurements for each treatment  
217 (0min, 15min, 30min, 45min, 60min). Animal distribution data were tested for differences over  
218 time within each treatment. Respective ANOVAs that tested every treatment for differences

219 between the subsequent measurements did not reveal any significant differences and data were  
220 therefore pooled for each treatment over time.

221 Swimming velocity

222 To determine adaptive swimming behavior, we conducted another experiment using ‘control’ and  
223 ‘fed *Utricularia*’ specimens. After preparing the treatments, the individuals were placed into a tank  
224 (12.5 cm x 10 cm x 2.5 cm) containing only charcoal-filtered tap-water ( $20^{\circ}\text{C} \pm 1^{\circ}\text{C}$ ) and were  
225 given five minutes for acclimation before the recordings began (27). We recorded the animals for  
226 five minutes at a frame rate of 30 fps using a Nikon D5100 (equipped with Nikon DX AF-S Nikkor  
227 18-105 mm 1:3.5-5.6 G ED; Nikon Corporation, Tokio, Japan). Afterwards, we analyzed ca. 800  
228 sequences of 5 seconds in which the animals were moving in a straight line and in parallel to the  
229 front pane of the tank. Movement of the animals’ geometric centers were tracked by hand using a  
230 self-scripted Matlab application (Matlab R2014b, The Mathworks Inc., Natick, MA, 2015). This  
231 program delivers the swimming velocity at any point in time and was subsequently used to  
232 calculate an average velocity for each individual. In total, we recorded and analyzed the swimming  
233 movements of 200 animals of each treatment.

234 Swimming mode

235 In *Daphnia* three different swimming modes can be classified: ‘hop & sink’, ‘zooming’ and  
236 ‘looping/spinning’ (47–51). The ‘hop and sink’ mode is characterized by alternating upward  
237 movements, powered by forceful strokes of the second antennae (hops), interrupted by periodical  
238 breaks (sink). In the ‘zooming’ mode daphniids display a series of fast swimming strokes with no

239 sinking phases in-between. In comparison, the ‘hop and sink’ mode is a rather slow swimming  
240 mode (<10mm/sec) whereas the ‘zooming’ mode is rather fast (>15mm/sec) (48). The  
241 ‘looping/spinning’ mode is displayed as a series of backward loopings. From the aforementioned  
242 recorded videos, we randomly analyzed 65 videos per treatment and determined the proportions  
243 of the swimming modes ‘hop & sink’ and ‘zooming’ since these were the dominant movement  
244 patterns. That was done by randomly choosing a time frame of 30 seconds in each of these videos,  
245 in which the animal was clearly visible and swimming in parallel to the aquarium’s front pane. In  
246 all of the 65 videos per treatment a time frame meeting our requirements was found.

#### 247 Predation experiments

248 We conducted predation trials to determine the effect of phenotypic changes on *U. australis*  
249 capture efficiency. For that, we placed 20 five-day-old ‘fed *Utricularia*’ or ‘control’ animals into  
250 a glass vial filled with 40 ml of charcoal-filtered tap water that contained a 5 cm long shoot of  
251 *U. australis* with a defined number of 30 empty traps. This setup was placed in a climate chamber  
252 at 20°C ±1°C and a day-night-cycle of 16:8 h. We counted the number of surviving animals  
253 twenty-four hours after the start of the experiment. We repeated the experiment 10 times for each  
254 treatment.

#### 255 Statistical Analysis

256 For the statistical analysis of our experimental data we used R x64 3.4.2(52) with a significance  
257 threshold  $\leq 0.05$  for all conducted tests. Tests and plots were conducted using the packages  
258 “ggplot2”(53), “gdata”(54), “ggpubr”(55), “ggsignif”(56), and “rstatix”(57).

259 Data of the 2D measurements followed a normal distribution (Shapiro test), so that we conducted  
260 a multivariate analysis of variance (MANOVA) with post-hoc test (Bonferroni-corrected pairwise  
261 t-test) to compare the four treatments across the six consecutive days of the experiment. We  
262 calculated  $\eta^2$  to estimate effect sizes based on the model used for the MANOVA.

263 Data of life-history parameters, i.e., brood sizes and the portion of sexually mature females did not  
264 follow a normal distribution and was thus analyzed using Kruskal-Wallis rank sum test  
265 (Bonferroni-corrected pairwise Wilcoxon-test) followed by determination of effect sizes using  $\eta^2$   
266 for each day.

267 The 3D data were based on the computed comparisons of the averaged point positions, using a  
268 displacement vector approach and furthermore, the point translocations along the coordinate axes  
269 (refer to Horstmann *et al.* 2018 for details). We tested these axes-wise point translocations with  
270 Wilcoxon-tests at a significance level  $\leq 0.01$ , conducted within the Matlab environment.  
271 Significance levels were adjusted for multiple testing based using False-Discovery-Rate (FDR)  
272 approach (58). This approach estimates the probability of declaring a not-differing feature as  
273 significantly different among all significant features, given as ‘q-value’. Finally, the 3D-forms of  
274 plant-exposed and control individuals were compared using confidence ellipsoids (40). We  
275 calculated the effect size Pearson’s  $r$  using R for each conducted Wilcoxon-test and averaged them  
276 (mean) for each analyzed axis.

277 The analysis of the predator avoidance experiment was based on the sections superimposed on the  
278 tank’s front pane. In order to analyze the vertical distribution of experimental animals we summed

279 up the counts for each row of the grid. Likewise, we summarized the animal count of every column  
280 to analyze the horizontal distribution. Horizontal and vertical distributions were tested for  
281 differences between treatments independently using a Kruskal-Wallis rank sum test (Bonferroni-  
282 corrected pairwise Wilcoxon-test) for each time-point of the experiment. Since we did not find any  
283 differences between the time-points, we eventually averaged all observations of animal  
284 distributions per treatment over time. Additionally, we analyzed this data-set as a distribution  
285 offset from the tap water control. For this, every animal count in the volumes was given an identical  
286 ‘weight’, enabling the calculation of a ‘center of mass’ in the 2D distribution for every treatment  
287 (averaged over time) based on the vertical and horizontal distributions. Using a vector plot, we  
288 illustrate the offset of each treatment’s specific center of mass in reference to the control’s center  
289 of mass.

290 For the statistical analysis of swimming velocity and swimming mode, we conducted Kruskal-  
291 Wallis rank sum tests followed by Bonferroni corrected pairwise Wilcoxon-tests between the  
292 respective treatments. Finally, we calculated  $\eta^2$  to determining effect sizes.

## 293 Results

### 294 Trap entrance dimensions

295 *U. australis* trap entrance dimensions were determined as 495  $\mu\text{m}$  ( $\pm 166 \mu\text{m}$  SD) average height  
296 and 613  $\mu\text{m}$  ( $\pm 147 \mu\text{m}$  SD) average width (n=20 each). Therefore, the trap entrances are typically  
297 wider than high (ratio  $\sim 1:1.23$ ).

298 Morphological alterations

299 2D investigation

300 In our first experiment, we tracked two-dimensional morphometrics, i.e. body length and body  
301 width, of *C. dubia* over a period of 6 days in 4 different treatments ('tap water control',  
302 '*Ceratophyllum* control', 'unfed *Utricularia*', 'fed *Utricularia*'). We found a significant effect of  
303 time and treatment on *C. dubia*'s body lengths as well as a significant interaction (MANOVA;  
304 time:  $F=437.163$ ,  $DF=6$ ,  $p<0.001$ ,  $\eta^2=0.606$ ; treatment:  $F=114.530$ ,  $DF=3$ ,  $p<0.001$ ,  $\eta^2=0.079$ ;  
305 treatment  $\times$  time:  $F=5.367$ ,  $DF=17$ ,  $p<0.001$ ,  $\eta^2=0.021$ ) (Fig. 1, SI Appendix, Table S1, Table S2).  
306 As the animals grow over time, we focused our Bonferroni-corrected post hoc analysis on the  
307 differences between treatments within the individual days of the experiment and found the induced  
308 animals showing significant differences in comparison to the controls. We found no differences  
309 between the two control treatments (i.e. 'tap water control' and '*Ceratophyllum* control'). On day  
310 1 of the experiment, we found the 'unfed' and 'fed *Utricularia*' exposed treatments to be  
311 significantly different in body lengths (SI Appendix, Table S3). The 'unfed *Utricularia*' treatment  
312 showed larger body length than the 'fed *Utricularia*' treatment. This difference between the two  
313 *Utricularia*-exposure treatments was not observed on day 2, 3 and 4 but on day 5 and 6. From day  
314 2 onwards the two control treatments showed significantly larger body length than the 'fed  
315 *Utricularia*' treatment (SI Appendix, Table S3). From day 3 onwards the 'tap water control'  
316 showed significantly larger body lengths than the 'unfed *Utricularia*' treatment. From day 5  
317 onwards the body length of both *Utricularia*-exposure treatments were significantly smaller than  
318 the control treatments (SI Appendix, Table S3).



319 MANOVA of the normalized body width also revealed a significant effect of time and treatment  
320 as well as a significant interaction (time:  $F=253.224$ ,  $DF=6$ ,  $p<0.001$ ,  $\eta^2=0.508$ ; treatment:  
321  $F=41.110$ ,  $DF=3$ ,  $p<0.001$ ,  $\eta^2=0.041$ ; treatment  $\times$  time:  $F=4.789$ ,  $DF=17$ ,  $p<0.001$ ,  $\eta^2=0.027$ )  
322 (Fig. 1, SI Appendix, Table S1, Table S2). Using Bonferroni post hoc analysis, within the  
323 individual days but between the treatments, we neither detected significant differences between  
324 the two control treatments nor between the two *Utricularia*-exposure treatments. On day 1 and 3  
325 of the experiment, a significant difference for normalized body widths was only detected between  
326 ‘fed *Utricularia*’ and the ‘*Ceratophyllum* control’ treatments with ‘fed *Utricularia*’ animals being  
327 smaller (SI Appendix, Table S4). For day 2, we found no significant differences between the  
328 treatments. On day 4, the normalized body widths of animals exposed to ‘fed *Utricularia*’ were  
329 significantly smaller than those of the ‘tap water control’ treatment (SI Appendix, Table S4). From  
330 day 5 onwards, morphological alterations became more prominent. On day 5 both *Utricularia*-  
331 exposed treatments had significantly smaller normalized body width than the ‘tap water control’  
332 treatment (SI Appendix, Table S4). Furthermore, the normalized body width of the ‘fed  
333 *Utricularia*’ treatment was significantly smaller than that of the ‘*Ceratophyllum* control’ treatment  
334 on day 5 (SI Appendix, Table S4). On day 6 both *Utricularia*-exposed treatments showed  
335 significantly smaller normalized body width than the two control treatments (SI Appendix, Table  
336 S4).

337 3D analysis

338 In order to obtain a comprehensive insight into the morphological adaptations of we analyzed 3D  
339 shape differences between control and *Utricularia*-induced 5 days old *C. dubia* using the method  
340 described by Horstmann et al.(40). Using this approach, we confirmed the same significant  
341 differences between control (Fig. 2A) and *Utricularia*-exposed animals in five-days old specimens  
342 (Fig. 2B). These differences in overall appearance (Fig. 2C) are supported by the confidence  
343 ellipsoid analysis, as it revealed no overlaps indicating the overall difference between both  
344 morphotypes (Fig. 2D). We found mean Pearson's  $r$  effect sizes of 0.733 for the dorso-ventral  
345 body axis, 0.791 for the anterior-posterior body axis, and 0.556 for the lateral body axis.

346 *Utricularia*-exposed animals (Fig. 2B) are smaller than control animals (Fig. 2A) of the same age,  
347 which is manifested in the body length (ctrl=0.725 mm  $\pm$ 0.0175, induced=0.529  $\pm$  0.038 mm,  
348 reduction of 27%). Additionally, we found a general dorsally directed shift of our landmarks of  
349 the ventral body regions (Fig. 2E). In contrast, our landmarks of the dorsal region are shifted  
350 ventrally, which makes the *Utricularia*-exposed animals slimmer than the controls. While the form  
351 alterations of the ventral and dorsal body regions are validated significant based on Wilcoxon-tests  
352 and FDR-testing, most shifts of our landmarks of the tail-spine region were not supported  
353 statistically significant ( $p>0.01$ ,  $q>0.001$ ) by the FDR approach (Fig. 2H).

354 Considering the shifts along the anterior-posterior body axis (Fig. 2F), we see that our landmarks  
355 of the anterior body parts (e.g. head) are significantly ( $p<0.01$ ,  $q<0.001$ ) shifted in posterior

356 direction, while the posterior ones are significantly ( $p < 0.01$ ,  $q < 0.001$ ) shifted in anterior direction  
357 (Fig. 2I).

358 In lateral direction, the strongest altered regions are the head, neck and brood pouch (Fig. 2G).  
359 Interestingly, the head's lateral width is larger by about 90  $\mu\text{m}$  (37%), leading to a total lateral  
360 width of 365  $\mu\text{m}$ . The neck region's width is larger by about 120  $\mu\text{m}$  (35%), leading to a total  
361 width of 475  $\mu\text{m}$ . This is mostly due to very pronounced fornices that are visibly formed only in  
362 *Utricularia*-exposed animals. In the region of the brood pouch, the *Utricularia*-exposed animals  
363 are thinner by about 90-120  $\mu\text{m}$ . In the region of the second antenna joint, the *Utricularia*-exposed  
364 animals are laterally slimmer as well.

### 365 Life-history shifts

366 We additionally determined the number of egg-carrying females as well as the individual clutch  
367 sizes of the animals used in our first experiment. Kruskal-Wallis tests revealed no significant  
368 differences in number of egg carrying females between the treatments (Fig. 3, SI Appendix, Table  
369 S5). However, from day 4 onward the 'tap water control' treatment showed a significantly larger  
370 clutch size than both *Utricularia*-exposed treatments (Day 4:  $\chi^2=317.54$ ,  $df=3$ ,  $p\text{-value}<0.001$ ,  
371  $\eta^2=0.157$ ; Day 5:  $\chi^2=586.6$ ,  $df=3$ ,  $p\text{-value}<0.001$ ,  $\eta^2=0.119$ ). On day 6 the '*Ceratophyllum* control'  
372 treatment also deposited significantly more eggs than the *Utricularia*-exposed treatments (Fig. 3,  
373 SI Appendix, Table S5) (Day 6:  $\chi^2=418.64$ ,  $df=3$ ,  $p\text{-value}<0.001$ ,  $\eta^2=0.137$ ).

374 Behavioral alterations

375 Predator avoidance

376 As a predator avoidance experiment we introduced 10 *C. dubia* into one of 5 different treatments  
377 (control animals/no plant, control animals/*Elodea*, control animals/*Utricularia*, ‘fed *Utricularia*’  
378 induced animals/*Elodea* and ‘fed *Utricularia*’ induced animals/*Utricularia* and recorded their  
379 position using a grid of 6 by 3 squares drawn on front panes of the tanks. During the experiment,  
380 the majority of animals were observed to aggregate in the two upper edges of the tank (Fig. 4;  
381 ANOVA,  $F=5.265$ ,  $p<0.001$ ,  $\eta^2=0.016$ ), i.e. the top sections (Fig. 4B) of the most left and right  
382 columns (Fig. 4A). This was true for all treatments. In the control treatments (tap water controls  
383 as well as control animals facing *E. canadensis*) no side preference was observed. In all treatments  
384 including *U. australis* (*Utricularia*-exposed animals as well as control animals) a significant side  
385 preference away from the plant and towards the water surface was observed (Fig 4; ANOVA,  
386  $F=10.260$ ,  $p<0.001$ ,  $\eta^2=0.036$ ).

387 Swimming modes

388 In order to detect differences in swimming behavior, we recorded videos of swimming *C. dubia* in  
389 control and ‘fed *Utricularia*’ states. We analyzed the recorded videos for the proportion of  
390 swimming modes that occur in the control and induced treatment. We found significant differences  
391 between the treatments (Kruskal-Wallis rank sum test;  $chi\text{-squared}=53.978$ ,  $DF=3$ ,  $p\leq 0.001$ ,  $\eta^2_{\text{Hop}}$   
392 and Sink=0.028,  $\eta^2_{\text{Zooming}}=0.023$ ). In the tap water control there was no significant difference between  
393 the percentage of duration of ‘zooming’ and ‘hop & sink’ swimming mode (Bonferroni corrected

394 pairwise-Wilcoxon-test;  $p \leq 0.05$ ). The tap water control animals performed ‘zooming’ in 43% of  
395 the investigated time, whereas ‘hop & sink’ was performed 57% of the time. The animals of the  
396 ‘fed *Utricularia*’ treatment showed significant differences in percentage of duration of the used  
397 swimming mode (Bonferroni corrected pairwise-Wilcoxon-test;  $p \leq 0.001$ ). They performed  
398 ‘zooming’ in roughly 25% of the time and ‘hop & sink’ in about 75% of the time (Fig. 5A). This  
399 resulted in significant higher percentage of ‘hop & sink’ mode in the ‘fed *Utricularia*’ treatment  
400 in comparison to the tap water control and significant lower respective percentage in ‘zooming’  
401 mode (Bonferroni corrected pairwise-Wilcoxon-test;  $p \leq 0.05$  for both comparisons).

#### 402 Swimming velocity

403 We additionally analyzed the above-mentioned video recordings for *C. dubia*’s swimming speed.  
404 Our analysis of the average swimming velocity showed that induced animals swam significantly  
405 slower than the control animals (Kruskal-Wallis rank sum test;  $chi\text{-squared}=359.09$ ,  $DF=3$ ,  
406  $p \leq 0.001$ ,  $\eta^2_{\text{Hop and Sink}}=0.06$ ,  $\eta^2_{\text{Zooming}}=0.025$ ). That is true for both swimming modes (pairwise  
407 Wilcoxon test;  $p_{\text{hop \& sink}} \leq 0.001$ ;  $p_{\text{zooming}} \leq 0.001$ ). In the ‘hop & sink’ mode, the average (median)  
408 velocity of control animals was  $\sim 2.3 \text{ mm} \cdot \text{s}^{-1}$  whereas that of induced animals was  $1.6 \text{ mm} \cdot \text{s}^{-1}$ . In  
409 the ‘zooming’ mode, the control animals swam at velocities of  $4.6 \text{ mm} \cdot \text{s}^{-1}$ , while the induced  
410 animals swam with an average (median) velocity of  $3.7 \text{ mm} \cdot \text{s}^{-1}$  (Fig. 5B). Resulting in a much  
411 shorter swimming distance over time for induced animals in either swimming mode.

412 Predation experiments

413 Finally, we performed a predation experiment in order to compare survival chances of control and  
414 ‘fed *Utricularia*’ individuals of *C. dubia*. The analysis of the predation data revealed significant  
415 differences between the two treatments (Mann-Whitney U-test;  $U=10.5$ ,  $p \leq 0.05$ ,  $n=10$ ,  $r=0.691$ ).  
416 More induced animals (median survival rate 97.5%) than control animals (median survival rate  
417 90%) survived in the presence of *U. australis*. The maximum number of trapped animals in our  
418 experiments were four for undefended and two for defended animals (Fig. 5C). In other words,  
419 *U. australis* caught every 10<sup>th</sup> control animal but only every 40<sup>th</sup> induced animal.

## 420 Discussion

421 In this study, we observed predator-induced, phenotypically plastic responses in form of  
422 morphological, life history and behavioral traits of *C. dubia* exposed to *U. australis*. The two  
423 species, both representatives of cosmopolitan clades, are members of a naturally co-occurring  
424 predator-prey system native to Central Europe (29–31).

425 Phenotypic plasticity in plant-animal interactions is long known and especially herbivore-induced  
426 plant defenses are well studied (59). Furthermore, herbivores are described to express dietary-  
427 induced plasticity in morphology and behavior allowing to deal with plant defenses (60,61).  
428 However, to our knowledge plant-induced defenses in an animal have not been described yet. In  
429 the following, we discuss the observed plastic responses and their adaptive benefit together with  
430 first insights into the nature and origin of the eliciting cue(s).

431 Morphological adaptations

432 We observed a change in overall body shape in *C. dubia* when exposed to *U. australis*: the animals  
433 are shorter and slimmer in the dorso-ventral dimension but functionally increase their lateral size  
434 via elongation of their fornices compared to control animals of the same age. The latter is  
435 substantial as their lateral dimension increases by 37%. Given the apparent gape limitation of the  
436 bladderwort suction traps we hypothesize that the defensive mechanism is a combination of  
437 functional size increase and suction force reduction at the same time. The elongated fornices can  
438 hinder the animal's entry into the trap by interfering with the traps entrance gape size while the  
439 slim body simultaneously allows the surrounding water to freely flow into the trap and eventually  
440 the pressure difference to equalize. We assume that the latter is key to this defense strategy since  
441 an overall increase in body dimensions would lead to a total or nearly total blockage of the trap  
442 entry with the result that the animal's body would experience the (nearly) full amount of lethal  
443 suction forces produced by the trap. Based on our data, induced animals will only be able to block  
444 the smaller trap entrances (lateral dimension: 475  $\mu\text{m}$ ; smallest trap entrances:  $495 \pm 166 \mu\text{m}$ ). As  
445 inducible morphological defenses in daphniid species are known to continuously grow with every  
446 molting cycle, we are certain that our data merely represent the threshold of the defensive effect  
447 and with continuous molts the defensive effect will increase. Additional to the aforementioned  
448 blocking effect the slimmer body may reduce the chances to mechanically trigger the traps. Smaller  
449 animals may also face smaller drag forces which could increase survival chances by reducing the  
450 acceleration of the animal towards the trap once the trap is triggered. Any of these effects may also

451 explain the prey preference towards larger prey as reported for two other *Utricularia* species by  
452 Guiral & Rougier (62).

#### 453 Life-history adaptations

454 In animals, exposed to *U. australis* during development, we detected changes of life-history  
455 parameters as they produce significantly less offspring per brood. Such a reduced number of  
456 offspring has been reported as a defense against visually hunting fish (63). *D. magna* becomes  
457 more prone to visual predator detection the more eggs are deposited in the brood pouch (64). In  
458 case of the mechanosensory-dependent *U. australis* predation, it is unlikely that a reduced number  
459 of offspring has the aforementioned effects. It is more likely to represent costs associated with the  
460 expression of defenses and the material required for the elongated fornices, and/or of a smaller  
461 brood pouch caused by the shape alteration. The decreased somatic growth rate may limit the  
462 amount of food that can be ingested since a reduced body size also limits the food filtration.  
463 Therefore, the observations may also be explained by the size-efficiency hypothesis (65).

#### 464 Behavioral adaptations

465 In comparison to morphological and life history adaptations that require some time to be expressed  
466 (here up to 5 days) (10,15,51,66,67), behavioral responses can be expressed quickly (6,27).  
467 Behavioral defenses, especially in *Daphnia*, can therefore function as temporary defenses, that  
468 bridge the time lag between predator perception and morphological defenses expression (68). In  
469 the presence of the carnivorous plant, the behavioral and morphological changes of *C. dubia* are  
470 expressed simultaneously. Maybe, the morphological changes alone do not suffice against a very



471 effective predator like *U. australis*, which can have a capture rate of 100% for undefended *C. dubia*  
472 in different juvenile instars (32).

473 In our experiments, *Utricularia*-exposed *C. dubia* avoided the presence of *U. australis* and  
474 *C. demersum*, likewise. Animals of the control group avoided only *U. australis*. Potentially,  
475 *Utricularia*-exposed animals show higher alertness that makes them avoid any regions shaded by  
476 plants. This might be an alteration in phototactic behavior as only our treatments that directly faced  
477 *U. australis* or were exposed to it prior to the experiment showed significant ‘open water’  
478 preferences. Control animals showed no significant avoidance of shaded areas. Fish evoke similar  
479 but opposite behavioral responses in *D. magna*: Lauridsen & Lodge (69) demonstrated that  
480 *D. magna* seeks shelter in plant thickets when threatened by young sunfish (*Lepomis cyanellus*).

481 In our analysis of swimming modes and speed we found the ‘hop & sink’ mode, which is a less  
482 directed, slower movement significantly increased in induced animals. Additionally, we found  
483 significantly reduced velocities of both observed modes in the *Utricularia*-exposed treatments  
484 compared to the control treatments. This overall reduction in swimming speed will either reduce  
485 the encounter rate between predator and prey (70) and/or it reduces the possibility to activate the  
486 trigger hairs on the *U. australis* trap door by reducing the kinetic energy of the animals (36). Such  
487 a behavioral adaptation is also known from *D. magna*, which reduce their swimming velocity in  
488 the presence of fish cues or homogenized conspecifics (27,71). A reduced swimming speed often  
489 comes at the cost of reduced feeding, which eventually leads to a reduced growth and fecundity  
490 (70).

491 Predation trials

492 In our predation trials we tested if the above-described defenses are beneficial and render *C. dubia*  
493 less susceptible to this plant predator. We show that induced animals expressing behavioral and  
494 morphological defenses are less often captured and thus are better protected against *U. australis*.  
495 As these phenotypic changes increase the survival of *C. dubia*, we hypothesize that they evolved  
496 in response to *U. australis* predation. The increase of survival rate of 7.5% in induced animals may  
497 seem rather insignificant on first sight, but it means for *Utricularia* to catch only every 40<sup>th</sup>  
498 daphniid instead of every 10<sup>th</sup>. Additionally, it is safe to assume that we only tested the early  
499 defensive effect in ontogeny as these defensive structures grow even more pronounced over  
500 subsequent molts like it is described for several daphniid species (e.g.(15)). However, this remains  
501 to be investigated in future studies. The defensive effect appears to be based on a synergism of  
502 behavioral and morphological adaptations with simultaneous life-history changes reflecting trade-  
503 offs of both types of defenses.

504 Origin of the defense-inducing stimulus

505 The origin of the cue that induces the observed alterations in *C. dubia*'s morphology, life-history  
506 and behavior is unclear. Based on our experiments we cannot exclude that *C. dubia* could sense  
507 *U. australis* trap firings via mechano-receptors or identify the plant optically. However, we suggest  
508 that *C. dubia* detects chemical substances released by *U. australis*. Since *U. australis* and *C. dubia*  
509 were separated by net cages in our experiments, mechanical and visual cues were strongly damped  
510 while chemical cues were not. Also, there are many examples described, especially in *Daphnia*,

511 where predator presence is detected chemically (44,72). Furthermore, we found reactions of  
512 *C. dubia* not only in fed *U. australis* treatments but also in unfed *U. australis* treatments. This  
513 suggests that it is not an alarm cue from conspecifics but a chemically active substance, a  
514 kairomone (73), released by *Utricularia* but not directly connected to predation activity. In contrast  
515 to this, the kairomone of *Chaoborus* larvae is released with digestive liquids (8,74) and induces  
516 neckteeth formation in *D. pulex* (75) only if predators are feeding. Nonetheless, *U. australis* fed  
517 with conspecifics of the investigated *C. dubia* induced stronger responses, e.g., stronger reduction  
518 of body length (Fig. 1). This suggests that the cue is stronger with successful capture or, at least,  
519 higher trap activity. For arming the traps, *U. australis* bladders constantly pump water out of their  
520 interiors (33) (for which the mechanism and pathway are not yet fully understood). They also  
521 exhibit spontaneous firings once a critical negative pressure is achieved (76). Moreover, prey  
522 capture leads to increased plant growth and production of larger traps (77) with a higher  
523 spontaneous firing rate (and thus resetting rate) (78). If *C. dubia* is able to sense (spontaneous) trap  
524 firings, detect the processes of digestion (79), trap resetting, respiration rate (80) and/or water  
525 excretion, *C. dubia* would have indirect measure(s) not only of trap presence but also activity.  
526 From *Daphnia*, it is known that they react to predator kairomones but also to broadly defined alarm  
527 signals (81). Alarm cues appear unlikely in our case given that prey organisms are not wounded  
528 during ingestion. In order to clarify the origin of the cue, further experiments are needed.

529

## 530 Conclusion

531 Predator induced phenotypic plasticity is discussed to evolve under certain circumstances (4):  
532 First, the predation pressure must be variable and occasionally strong. Second, the predator must  
533 be perceptible by a reliable cue. Third, the induced defense must be effective. Fourth, the defense  
534 should be associated with costs or trade-offs. *U. australis* shows variability in abundance  
535 throughout the year with high abundances during summer and a resting stage during winter (82).  
536 Furthermore, the trap number of *U. australis* varies in dependence of biotic and abiotic factors  
537 reaching peak densities that pose severe threat to zooplankters (83). Given that *U. australis*  
538 exhibits the necessary variability in trap abundance and causes high predatory pressure at least  
539 during the summer months, the first prerequisite for inducible defenses is already fulfilled. Second,  
540 we present strong evidence for a reasonably reliable cue that enables *C. dubia* to perceive  
541 *U. australis* and react on its presence with a set of behavioral and morphological alterations. Third,  
542 we show that these adaptive changes are effective as induced *C. dubia* are consumed less by  
543 *U. australis*. Fourth, our experiments also show that the fecundity of induced animals is reduced,  
544 thus these alterations come at the expense of population growth rate. In summary, our study  
545 strongly suggests the evolution of animal inducible defenses against a predatory plant.

546 With inducible defense strategies being highly predator-specific and the fact that *U. australis* is  
547 only one representative of a cosmopolitan genus containing more than 250 species, we expect *C.*  
548 *dubia* not to be the only member of the Daphniidae family to thwart this "green threat" with  
549 inducible defenses. The carnivorous waterwheel plant (*Aldrovanda vesiculosa*) with snap-traps is

550 another aquatic predator for daphniids and other zooplankters (84,85). In fact, given the variety of  
551 carnivorous plants, their trapping principles and sometimes narrow prey spectra (86) there  
552 probably is a number of inducible defenses against them yet to be identified in different species  
553 and ecosystems.

554 The predation experiment data did not follow a normal distribution and was therefore analyzed  
555 using non-parametric methods. The treatments were tested for differences using a Mann-Whitney  
556 U-test followed by a calculation of Pearson's  $r$  for effect size.

## 557 Acknowledgements

558 **Funding:** S.P. and T.S. acknowledge funding by the Joint Research Network on Advanced  
559 Materials and Systems (JONAS). S.K. is grateful for funding by the DFG; Project funded by the  
560 Deutsche Forschungsgemeinschaft (DFG, German Research Foundation) – 409126405. A.S.W.  
561 and T.S. are grateful to the Deutsche Forschungsgemeinschaft (DFG, German Research  
562 Foundation) for funding within the framework of the CRC-Transregio 141 “Biological Design and  
563 Integrative Structures – Analysis, Simulation and Implementation in Architecture”. A.S.W. and  
564 T.S. furthermore acknowledge funding by the collaborative project “Bio-inspirierte elastische  
565 Materialsysteme und Verbundkomponenten für nachhaltiges Bauen im 21ten Jahrhundert”  
566 (BioElast) within the “Zukunftsoffensive IV Innovation und Exzellenz - Aufbau und Stärkung der  
567 Forschungsinfrastruktur im Bereich der Mikro- und Nanotechnologie sowie der neuen  
568 Materialien“ of the State Ministry of Baden-Wuerttemberg for Sciences, Research and Arts. M.H.  
569 acknowledges funding by the „Studienstiftung des dt. Volkes“.

570 **Author Contributions:** SK, MH, SP, TS and RT designed the experiments. EB and NK conducted  
571 the experiments with supervision of SK and MH. LCW and RT supervised the culturing of  
572 *C. dubia*, SP and TS supervised the culturing of *U. australis*. SK and MH analyzed the data. LCW,  
573 SP and AW revised the statistical analysis. SK, MH and LCW wrote the first draft, SP, AW, TS  
574 and RT revised the draft and equally contributed to the final draft. TS and RT supervised the study  
575 and contributed their expertise and laboratory facilities.

## 576 References

- 577 1. Černý M, Bytel J. Density and size distribution of Daphnia populations at different fish  
578 predation levels. *Hydrobiologia*. 1991;225(1):199–208.
- 579 2. Zaret TM. Predators, invisible prey, and the nature of polymorphism in the cladocera. *Limnol*  
580 *Oceanogr*. 1972;17(2):171–84.
- 581 3. Dodson SI. Adaptive change in plankton morphology in response to size-selective predation:  
582 A new hypothesis of cyclomorphosis. *Limnol Oceanogr*. 1974;19(5):721–9.
- 583 4. Tollrian R, Harvell CD. *The Ecology and Evolution of Inducible Defenses* [Internet]. New  
584 Jersey: Princeton University Press; 1999 [cited 2014 Dec 11]. 383 p. Available from:  
585 [http://scholar.google.de/scholar?hl=de&as\\_sdt=0,5&q=tollrian+and+harvell+inducible+defen](http://scholar.google.de/scholar?hl=de&as_sdt=0,5&q=tollrian+and+harvell+inducible+defenses#1)  
586 [ses#1](http://scholar.google.de/scholar?hl=de&as_sdt=0,5&q=tollrian+and+harvell+inducible+defenses#1)
- 587 5. Weiss LC, Laforsch C, Tollrian R. The taste of predation and the defences of prey. In:  
588 Hansson LA, Brönmark C, editors. *Chemical Ecology in Aquatic Systems*. New York: Oxford  
589 University Press; 2012. p. 111–26.

- 590 6. Weiss LC, Tollrian R. PREDATOR-INDUCED DEFENSES IN CRUSTACEA. In: The  
591 Natural History of the Crustacea: Life Histories. 2018. p. 303–21.
- 592 7. Riessen HP, Gilbert JJ. Divergent developmental patterns of induced morphological defenses  
593 in rotifers and Daphnia: Ecological and evolutionary context. *Limnol Oceanogr.*  
594 2019;64(2):541–57.
- 595 8. Krueger DA, Dodson SI. Embryological induction and predation ecology in *Daphnia pulex*.  
596 *Limnol Oceanogr* [Internet]. 1981;26(2):219–23. Available from:  
597 [http://www.aslo.org/lo/toc/vol\\_26/issue\\_2/0219.html](http://www.aslo.org/lo/toc/vol_26/issue_2/0219.html)
- 598 9. Spitze K, Sadler TD. Evolution of a generalist genotype: Multivariate analysis of the  
599 adaptiveness of phenotypic plasticity. *Am Nat.* 1996;148(Supplement (November)):108–23.
- 600 10. Weiss LC, Heilgenberg E, Deussen L, Becker SM, Kruppert S, Tollrian R. Onset of  
601 kairomone sensitivity and the development of inducible morphological defenses in *Daphnia*  
602 *pulex*. *Hydrobiologia* [Internet]. 2016;1–11. Available from:  
603 <http://dx.doi.org/10.1007/s10750-016-2809-4>
- 604 11. Petrusek A, Tollrian R, Schwenk K, Haas A, Laforsch C. A “crown of thorns” is an  
605 inducible defense that protects *Daphnia* against an ancient predator. *Proc Natl Acad Sci U S A*  
606 [Internet]. 2009 Feb 17;106(7):2248–52. Available from:  
607 [http://www.pubmedcentral.nih.gov/articlerender.fcgi?artid=2650140&tool=pmcentrez&rende](http://www.pubmedcentral.nih.gov/articlerender.fcgi?artid=2650140&tool=pmcentrez&rendertype=abstract)  
608 [rtype=abstract](http://www.pubmedcentral.nih.gov/articlerender.fcgi?artid=2650140&tool=pmcentrez&rendertype=abstract)

- 609 12. Tollrian R. Predator-induced helmet formation in *Daphnia cucullata* (Sars). Arch für  
610 Hydrobiol [Internet]. 1990 [cited 2015 May 8];119(2):191–6. Available from:  
611 <http://www.cabdirect.org/abstracts/19940501675.html?freeview=true>
- 612 13. Tollrian R. Fish-kairomone induced morphological changes in *Daphnia lumholtzi* (Sars).  
613 Arch für Hydrobiol [Internet]. 1994 [cited 2015 May 8];130(1):69–75. Available from:  
614 <http://pubman.mpd.l.mpg.de/pubman/faces/viewItemOverviewPage.jsp?itemId=escidoc:15085>  
615 97
- 616 14. Barry MJ, Bayly IA. Further Studies on Predator Induction of Crests in Australian  
617 *Daphnia* and the Effects of Crests on Predation. Mar Freshw Res [Internet]. 1985 [cited 2014  
618 Dec 11];36(4):519–35. Available from:  
619 [http://www.publish.csiro.au/view/journals/dsp\\_journal\\_fulltext.cfm?nid=126&f=MF9850519](http://www.publish.csiro.au/view/journals/dsp_journal_fulltext.cfm?nid=126&f=MF9850519)
- 620 15. Weiss LC, Leimann J, Tollrian R. Predator-induced defences in *Daphnia longicephala*:  
621 location of kairomone receptors and timeline of sensitive phases to trait formation. J Exp Biol  
622 [Internet]. 2015;218(18):2918–26. Available from:  
623 <http://jeb.biologists.org/cgi/doi/10.1242/jeb.124552>
- 624 16. Grant JWG, Bayly IA. Predator induction of crests in morphs of the *Daphnia carinata*  
625 King complex. Limnol Oceanogr. 1981;26(2):201–18.
- 626 17. Laforsch C, Ngwa W, Grill W, Tollrian R. An acoustic microscopy technique reveals  
627 hidden morphological defenses in *Daphnia*. Proc Natl Acad Sci U S A [Internet]. 2004 Nov  
628 9;101(45):15911–4. Available from:



- 629 <http://www.pubmedcentral.nih.gov/articlerender.fcgi?artid=528736&tool=pmcentrez&rendert>  
630 [ype=abstract](#)
- 631 18. Rabus M, Söllradl T, Clausen-Schaumann H, Laforsch C. Uncovering Ultrastructural  
632 Defences in *Daphnia magna* - An Interdisciplinary Approach to Assess the Predator-Induced  
633 Fortification of the Carapace. PLoS One [Internet]. 2013 Jan [cited 2013 Aug 7];8(6):e67856.  
634 Available from:  
635 <http://www.pubmedcentral.nih.gov/articlerender.fcgi?artid=3680394&tool=pmcentrez&rende>  
636 [rtype=abstract](#)
- 637 19. Kruppert S, Horstmann M, Weiss LC, Witzel U, Schaber CF, Gorb SN, et al.  
638 Biomechanical properties of predator-induced body armour in the freshwater crustacean  
639 *Daphnia*. Sci Rep [Internet]. 2017;7(1):9750. Available from:  
640 <http://www.nature.com/articles/s41598-017-09649-5>
- 641 20. Machacek J. Indirect effect of planktivorous fish an the growth and reproduction of  
642 *Daphnia galeata*. Hydrobiologia. 1991;225:193–7.
- 643 21. Weider LJ, Pijanowska J. Plasticity of *Daphnia* Life Histories in Response to Chemical  
644 Cues from Predators. Oikos. 1993;67(3):385–92.
- 645 22. Dodson SI, Havel JE. Indirect prey effects: Some morphological and life history  
646 responses of *Daphnia pulex* exposed to *Notonecta undulata*. Limnol Oceanogr. 1988;33(6,  
647 part 1):1274–85.

- 648 23. Hanazato T, Yasuno M. Zooplankton community structure driven by vertebrate and  
649 invertebrate predators. *Oecologia* [Internet]. 1989 Dec;81(4):450–8. Available from:  
650 <http://www.springerlink.com/index/10.1007/BF00378951>
- 651 24. Stibor H. Predator induced life-history shifts in a freshwater cladoceran. *Oecologia*.  
652 1992;92:162–5.
- 653 25. Stibor H, Lüning J. Predator-induced phenotypic variation in the pattern of growth and  
654 reproduction in *Daphnia hyalina* (Crustacea: Cladocera). *Funct Ecol*. 1994;8(1):97–101.
- 655 26. Lampert W. The adaptive significance of diel vertical migration of zooplankton. *Funct*  
656 *Ecol* [Internet]. 1989 [cited 2014 Dec 11];3(1):21–7. Available from:  
657 <http://pubman.mpdl.mpg.de/pubman/item/escidoc:1671149:2>
- 658 27. Langer SM, Tollrian R, Bianco G, Hansson L-A, Weiss LC, Ekvall MT. A three-  
659 dimensional perspective of *Daphnia* 's swimming behavior with and without predator cues.  
660 *Limnol Oceanogr*. 2019;
- 661 28. Havel JE, Dodson SI. Environmental cues for cyclomorphosis in *Daphnia retrocurva*  
662 Forbes. *Freshw Biol* [Internet]. 1985 Aug [cited 2015 Jul 14];15(4):469–78. Available from:  
663 <http://doi.wiley.com/10.1111/j.1365-2427.1985.tb00217.x>
- 664 29. Mette N, Wilbert N, Barthlott W. Food composition of Aquatic Bladderworts  
665 (*Utricularia*, *Lentibulariaceae*) in Various Habitats. *Beiträge zur Biol der Pflanz* [Internet].  
666 2000;72:1–13. Available from: [http://www.nmette.de/utricularia\\_e.htm](http://www.nmette.de/utricularia_e.htm)

- 667 30. Kurbatova S a., Yershov IY. Crustaceans and rotifers in the predatory feeding of  
668 Utricularia. *Inl Water Biol* [Internet]. 2009;2(3):271–5. Available from:  
669 <http://link.springer.com/10.1134/S1995082909030122>
- 670 31. Harms S. The effect of bladderwort (*Utricularia*) predation on microcrustacean prey.  
671 *Freshw Biol*. 2002;47(9):1608–17.
- 672 32. Poppinga S, Daber LE, Westermeier AS, Kruppert S, Horstmann M, Tollrian R, et al.  
673 Biomechanical analysis of prey capture in the carnivorous Southern bladderwort (*Utricularia*  
674 *australis*). *Sci Rep* [Internet]. 2017 Dec 11;7(1):1776. Available from:  
675 <http://www.nature.com/articles/s41598-017-01954-3>
- 676 33. Adamec L. Functional characteristics of traps of aquatic carnivorous *Utricularia* species.  
677 *Aquat Bot*. 2011;95(3):226–33.
- 678 34. Sasago A, Sibaoka T. Water Extrusion in the Trap Bladders of *Utricularia vulgaris* II . A  
679 Possible Mechanism of Water Outflow. *Bot Mag Tokyo*. 1985;98:113–24.
- 680 35. Sasago A, Sibaoka T. Water Extrusion in the Trap Bladders of *Utricularia vulgaris* I. A  
681 Possible Pathway of Water across the Bladder Wall. *Bot Mag Tokyo*. 1985;98:55–66.
- 682 36. Vincent O, Weisskopf C, Poppinga S, Masselter T, Speck T, Joyeux M, et al. Ultra-fast  
683 underwater suction traps. *Proc Biol Sci* [Internet]. 2011 Oct 7 [cited 2012 Oct  
684 24];278(1720):2909–14. Available from:  
685 [http://www.pubmedcentral.nih.gov/articlerender.fcgi?artid=3151700&tool=pmcentrez&rende](http://www.pubmedcentral.nih.gov/articlerender.fcgi?artid=3151700&tool=pmcentrez&rendertype=abstract)  
686 [rtype=abstract](http://www.pubmedcentral.nih.gov/articlerender.fcgi?artid=3151700&tool=pmcentrez&rendertype=abstract)

- 687 37. Poppinga S, Weisskopf C, Westermeier AS, Masselter T, Speck T. Fastest predators in  
688 plant kingdom: Functional morphology and biomechanics of suction traps found in the largest  
689 genus of carnivorous plants. *AoB Plants* [Internet]. 2015;plv140. Available from:  
690 <http://aobplants.oxfordjournals.org/lookup/doi/10.1093/aobpla/plv140>
- 691 38. Juniper BE, Robins RJ, Joel DM. *The carnivorous plants*. London: Academic Press;  
692 1989.
- 693 39. Gordon E, Pacheco S. Prey composition in the carnivorous plants *Utricularia inflata* and  
694 *U. gibba* (Lentibulariaceae) from Paria Peninsula, Venezuela. *Rev Biol Trop* [Internet].  
695 2007;55(December):795–803. Available from:  
696 <http://www.redalyc.org/articulo.oa?id=44912352006>
- 697 40. Horstmann M, Topham AT, Stamm P, Kruppert S, Colbourne JK, Tollrian R, et al. Scan,  
698 extract, wrap, compute—a 3D method to analyse morphological shape differences. *PeerJ*  
699 [Internet]. 2018;6:e4861. Available from: <https://peerj.com/articles/4861>
- 700 41. Kruppert S, Horstmann M, Weiss LC, Schaber CF, Gorb SN, Tollrian R. Push or Pull?  
701 The light-weight architecture of the *Daphnia pulex* carapace is adapted to withstand tension,  
702 not compression. *J Morphol* [Internet]. 2016;277(10):1320–8. Available from:  
703 <http://doi.wiley.com/10.1002/jmor.20577>
- 704 42. Westermeier AS, Fleischmann A, Müller K, Schäferhoff B, Rubach C, Speck T, et al.  
705 Trap diversity and character evolution in carnivorous bladderworts (*Utricularia*,  
706 *Lentibulariaceae*). *Sci Rep*. 2017;7(1):1–24.

- 707 43. Adamec L. Why do aquatic carnivorous plants prefer growing in dystrophic waters?  
708 ACTA Biol Slov. 2012;55(1):3–8.
- 709 44. Weiss LC. Sensory Ecology of Predator-Induced Phenotypic Plasticity. Front Behav  
710 Neurosci. 2019;12(January):1–12.
- 711 45. Mitchell MD, Bairos-Novak KR, Ferrari MCO. Mechanisms underlying the control of  
712 responses to predator odours in aquatic prey. J Exp Biol. 2017;220:1937–46.
- 713 46. Ekvall MT, Bianco G, Linse S, Linke H, Bäckman J, Hansson LA. Three-dimensional  
714 tracking of small aquatic organisms using fluorescent nanoparticles. PLoS One.  
715 2013;8(11):1–8.
- 716 47. Wickramaratna LN, Noss C, Lorke A. Hydrodynamic trails produced by Daphnia: Size  
717 and energetics. PLoS One. 2014;9(3).
- 718 48. O’Keefe TC, Brewer MC, Dodson SI. Swimming behavior of Daphnia : its role in  
719 determining predation risk. J Plankton Res [Internet]. 1998;20(5):973–84. Available from:  
720 <http://plankt.oxfordjournals.org/cgi/doi/10.1093/plankt/20.5.973>
- 721 49. Dodson SI, Ramcharan C. Size-specific swimming behavior of Daphnia pulex. J Plankton  
722 Res [Internet]. 1991;13(6):1367–79. Available from:  
723 <http://plankt.oxfordjournals.org/cgi/doi/10.1093/plankt/13.6.1367>
- 724 50. Mort MA. Chaoborus predation and the function of phenotypic variation in Daphnia.  
725 Hydrobiologia. 1986;133:39–44.

- 726 51. Dodson SI, Hanazato T, Gorski PR. Behavioral responses of *Daphnia pulex* exposed to  
727 carbaryl and *Chaoborus* kairomone. *Environ Toxicol Chem* [Internet]. 1995;14(1):43–50.  
728 Available from: <http://doi.wiley.com/10.1002/etc.5620140106>
- 729 52. R Development Core Team. R: A language and environment for statistical computing.  
730 Vienna: R Foundation for Statistical Computing; 2020.
- 731 53. Wickham H. *ggplot2: Elegant Graphics for Data Analysis*. Springer-Verlag New York;  
732 2009.
- 733 54. Warnes GR, Bolker B, Gorjanc G, Grothendieck G, Korosec A, Lumley T, et al. *gdata*:  
734 Various R programming tools for data manipulation. R package version 2.18.0. 2017.
- 735 55. Kassambara A. ‘ggpubr’: “ggplot2” Based Publication Ready Plots. R package version  
736 0.2.5. 2020.
- 737 56. Ahlmann-Eltze C. *ggsignif*: Significance Brackets for “ggplot2.” R package version  
738 0.6.0. 2019.
- 739 57. Kassambra A. *rstatix*: Pipe-Friendly Framework for Basic Statistical Tests. R Packag  
740 version 060. 2020;
- 741 58. Storey JD, Tibshirani R. Statistical significance for genomewide studies. *Proc Natl Acad*  
742 *Sci* [Internet]. 2003;100(16):9440–5. Available from:  
743 <http://www.pnas.org/cgi/doi/10.1073/pnas.1530509100>
- 744 59. Chen MS. Inducible direct plant defense against insect herbivores: A review. *Insect Sci*.  
745 2008;15(2):101–14.

- 746 60. Keathley CP, Potter DA. Behavioral plasticity of a grass-feeding caterpillar in response to  
747 spiny- or smooth-edged leaf blades. *Arthropod Plant Interact.* 2011;5(4):339–49.
- 748 61. Thompson DB. Consumption rates and the evolution of diet-induced plasticity in the  
749 head morphology of *Melanoplus femurrubrum* (Orthoptera: Acrididae). *Oecologia.*  
750 1992;89(2):204–13.
- 751 62. Guiral D, Rougier C. Trap size and prey selection of two coexisting bladderwort  
752 (*Utricularia*) species in a pristine tropical pond (French Guiana) at different trophic levels.  
753 *Ann Limnol.* 2007;43(3):147–59.
- 754 63. Dodson SI. The ecological role of chemical stimuli for the zooplankton: predator-induced  
755 morphology in *Daphnia*. *Oecologia* [Internet]. 1989;78(3):361–7. Available from:  
756 <http://www.springerlink.com/index/10.1007/BF00379110>
- 757 64. Tucker RP, Woolpy SP. The effect of parthenogenetic eggs in *Daphnia magna* on prey  
758 location by the bluegill sunfish (*Lepomis macrochirus*). *Hydrobiologia.* 1984;109(1967):215–  
759 7.
- 760 65. Brooks JL, Dodson SI. Brooks and Dodson, predation, body size and composition of  
761 zooplankton. *Science* (80- ). 1965;150(3692):28–35.
- 762 66. Aránguiz-Acuña A, Ramos-Jiliberto R, Sarma N, Sarma SSS, Bustamante RO, Toledo V.  
763 Benefits, costs and reactivity of inducible defences: An experimental test with rotifers.  
764 *Freshw Biol.* 2010;55(10):2114–22.

- 765 67. Freeman AS. The maintenance, evolution, and impacts of inducible morphological  
766 defenses in *Mytilus edulis*: Responses to multiple and invasive predators. Dissertation  
767 Abstracts International. Vol. 68, no. 04, suppl. B, 151 p. 2007. 2007.
- 768 68. Meester L De, Cousyn C. The change in phototactic behaviour of a *Daphnia magna* clone  
769 in the presence of fish kairomones: the effect of exposure time. *Hydrobiologia* [Internet].  
770 1997;360(1–3):169–75. Available from:  
771 <http://link.springer.com/article/10.1023/A%3A1003119827390>  
772 [http://link.springer.com/a](http://link.springer.com/article/10.1023%2FA%3A1003119827390#page-1)  
773 [rticle/10.1023%2FA%3A1003119827390#page-](http://link.springer.com/content/pdf/10.1023%2FA%3A1003119827390.pdf)  
774 [1%0Ahttp://link.springer.com/content/pdf/10.1023%2FA%3A1003119827390.pdf](http://link.springer.com/content/pdf/10.1023%2FA%3A1003119827390.pdf)
- 774 69. Lauridsen TL, Lodge DM. Avoidance by *Daphnia magna* of fish and macrophytes:  
775 Chemical cues and predator-mediated use of macrophyte habitat. *Limnol Oceanogr* [Internet].  
776 1996 Jun;41(4):794–8. Available from: <http://doi.wiley.com/10.4319/lo.1996.41.4.0794>
- 777 70. Gerritsen J, Strickler JR. Encounter Probabilities and Community Structure in  
778 Zooplankton: a Mathematical Model. *J Fish Board Canada*. 1977;34(1):73–82.
- 779 71. Pijanowska J, Kowalczewski A. Cues from Injured *Daphnia* and from Cyclopoids  
780 Feeding on *Daphnia* Can Modify Life-Histories of Conspecifics. *Hydrobiologia*. 1997;Vol  
781 350(Iss AUG):99–103.
- 782 72. Tollrian R, Dodson SI. Inducible defenses in Cladocera: Constraints, costs, and  
783 multipredator environments. In: Tollrian R, Harvell CD, editors. *The Ecology and Evolution*  
784 *of Inducible Defenses*. Princeton, New Jersey: Princeton University Press; 1999. p. 177–202.



- 785 73. Brown, WL, Eisner T, Whittaker RH. Allomones and Kairomones: Transspecific  
786 Chemical Messengers. *Bioscience* [Internet]. 1970;20(1):21–2. Available from:  
787 <https://academic.oup.com/bioscience/article-lookup/doi/10.2307/1294753>
- 788 74. Weiss LC, Albada B, Becker SM, Meckelmann SW, Klein J, Meyer M, et al.  
789 Identification of Chaoborus kairomone chemicals that induce defences in *Daphnia*. *Nat Chem*  
790 *Biol* [Internet]. 2018;14(12):1133–9. Available from:  
791 <http://www.ncbi.nlm.nih.gov/pubmed/30429602>[http://www.nature.com/articles/s41589-](http://www.nature.com/articles/s41589-018-0164-7)  
792 018-0164-7
- 793 75. Tollrian R. Neckteeth formation in *Daphnia pulex* as an example of continuous  
794 phenotypic plasticity: Morphological effects of *Chaoborus* kairomone concentration and their  
795 quantification. *J Plankton Res* [Internet]. 1993;15(11):1309–18. Available from:  
796 <http://plankt.oxfordjournals.org/cgi/doi/10.1093/plankt/15.11.1309>
- 797 76. Adamec L, Poppinga S. Measurement of the critical negative pressure inside traps of  
798 aquatic carnivorous *Utricularia* species. *Aquat Bot* [Internet]. 2016;133:10–6. Available from:  
799 <http://dx.doi.org/10.1016/j.aquabot.2016.04.007>
- 800 77. Adamec L. Photosynthetic CO<sub>2</sub> affinity of the aquatic carnivorous plant *Utricularia*  
801 *australis* (Lentibulariaceae) and its investment in carnivory. *Ecol Res*. 2009;24(2):327–33.
- 802 78. Hall MR. Assessing the costs and benefits of active traps in the carnivorous plant  
803 *Utricularia australis*: effects of trap size and age. University of California Fresno; 2018.
- 804 79. Englund G, Harms S. Effects of light and microcrustacean prey on growth and  
805 investment in carnivory in *Utricularia vulgaris*. *Freshw Biol*. 2003;48(5):786–94.

- 806 80. Adamec L. Respiration and photosynthesis of bladders and leaves of aquatic *Utricularia*  
807 species. *Plant Biol.* 2006;8(6):765–9.
- 808 81. Laforsch C, Tollrian R. Inducible Defenses in Multipredator Environments :  
809 Cyclomorphosis in *Daphnia cucullata*. *Ecology.* 2004;85(8):2302–11.
- 810 82. Adamec L, Kučerová A. Overwintering temperatures affect freezing temperatures of  
811 turions of aquatic plants. *Flora Morphol Distrib Funct Ecol Plants.* 2013;208(8–9):497–501.
- 812 83. Adamec L. Mineral nutrient relations in the aquatic carnivorous plant *Utricularia*  
813 *australis* and its investment in carnivory. *Fundam Appl Limnol / Arch für Hydrobiol.*  
814 2008;171(3):175–83.
- 815 84. Horstmann M, Heier L, Kruppert S, Weiss LC, Tollrian R, Adamec L, et al. Comparative  
816 Prey Spectra Analyses on the Endangered Aquatic Carnivorous Waterwheel Plant (  
817 *Aldrovanda vesiculosa*, Droseraceae) at Several Naturalized Microsites in the Czech  
818 Republic and Germany. *Integr Org Biol [Internet].* 2019;1(1). Available from:  
819 <https://academic.oup.com/iob/article/doi/10.1093/iob/oby012/5419227>
- 820 85. Poppinga S, Smajj J, Westermeier AS, Horstmann M, Kruppert S, Tollrian R, et al. Prey  
821 capture analyses in the carnivorous aquatic waterwheel plant (*Aldrovanda vesiculosa* L.,  
822 Droseraceae). *Sci Rep [Internet].* 2019;9(1):1–13. Available from:  
823 <http://dx.doi.org/10.1038/s41598-019-54857-w>
- 824 86. Darnowski D, Bauer U, Mendez M, Horner JD, Plancho BJ. Prey selection and  
825 specialization by carnivorous plants. In: Ellison AM, Adamec L, editors. *Carnivorous Plants:*  
826 *Physiology, ecology and evolution.* Oxford University Press; 2018. p. 285–93.

## 827 Figure Legends

### 828 **Figure 1: Morphological changes in *C. dubia* as a response to the presence of *U. australis*.** (A)

829 Body lengths measurements over a duration of 6 days for 4 different treatments including two  
830 control treatments and two Utricularia-exposed treatments. (B) Normalized body widths (body  
831 width/body length) accordingly. Utricularia-exposed animals show significantly smaller body  
832 length and normalized body width as the control treatments.

### 833 **Figure 2: 3D analysis of morphological alterations between control and Utricularia-exposed**

834 ***C. dubia*.** Control (A) and Utricularia-exposed *C. dubia* (B) of same age, scale bar = 1 mm. All  
835 subsequent analyses are projected on the average Utricularia-exposed animal. (C) Overall  
836 deformation, strong shifts are colored in shades of red, while small or no changes are indicated by  
837 shades of blue. (D) Confidence ellipsoid plot, revealing no overlapping confidence ellipsoids. (E)-  
838 (F): Here, shades of red indicate a shift in positive direction on that axis (dorsal/anterior/distal),  
839 shades of blue indicate a shift in negative direction on the respective axis  
840 (ventral/posterior/proximal). Shifts along the anterior-posterior (E) and dorso-ventral axis (F)  
841 show that the animals are smaller in the Utricularia-exposed morph. The deformation in the lateral  
842 dimension (G) gives regions of reduced and increased body width. Most of the found shifts are  
843 proofed significant with respective Wilcoxon tests and FDR-based q-values (H)-(K). These figures  
844 give regions with p-values of respective Wilcoxon tests lower than 0.01 coloured yellow, regions  
845 that showed in addition q-values lower than 0.001, are coloured red. For the respective analysis,  
846 all samples of both treatments were taken into account (ninduced= 8, ncontrol = 13).

847 **Figure 3: Changes in life history (in terms of clutch size alterations) of *C. dubia* in the**  
848 **presence of *U. australis*.** *C. dubia* revealed smaller clutch sizes ( $p \leq 0.01$ ) in presence of *U.*  
849 *australis* compared to the control treatments from day 4 onwards, stagnating at about 1 egg per  
850 female.

851 **Figure 4: Changes in behaviour in *C. dubia* observed as averaged distribution pattern with**  
852 **respect to the presence of either *U. australis* or *E. canadensis*.** (A) The box plots indicate the  
853 number of animals per column in the canvas drawn on the tank front pane. Increasing numbers on  
854 the x axis are equal to an increase in distance to the respective plant used in that treatment (1 equals  
855 to the same column as the plant, 6 is the opposite tank side). (B) The box plots indicate the number  
856 of animals per row. (C) The additional vector graph inlet is indicating the average positioning of  
857 the animals in respective to the plant by depicting a vector that represents the ‘calculated center of  
858 mass’ for every treatment as an offset from the tap water control-treatment.

859 **Figure 5: Behavioral changes in *C. dubia* as response to the presence of *U. australis*:** average  
860 duration (A) and velocity (B) of the two observed swimming modes in the ‘swimming modes’  
861 experiments. (C) Survival rate of 20 five-days old *C. dubia* (either control or Utricularia-exposed)  
862 over 24h in the presence of 30 *U. australis* traps.

863

864 **Figure 1**

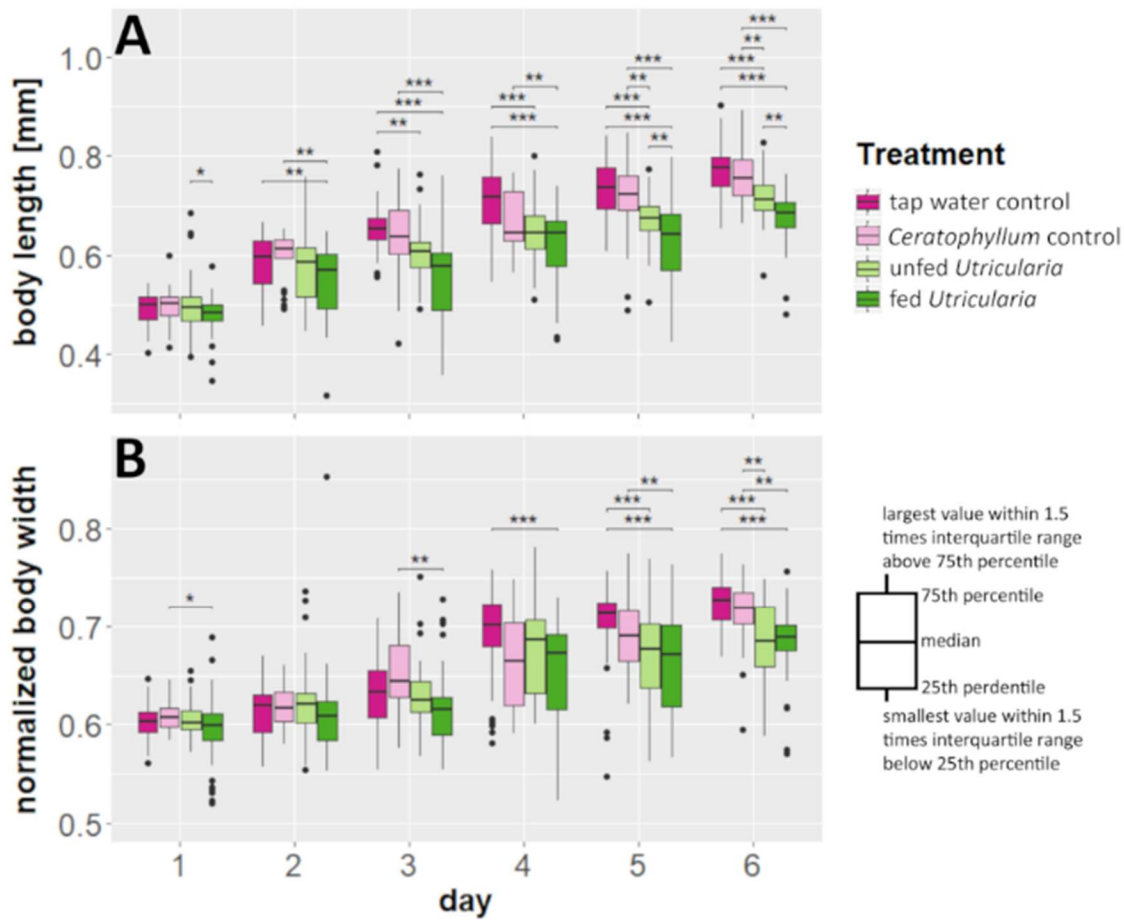

865

866

867 **Figure 2**

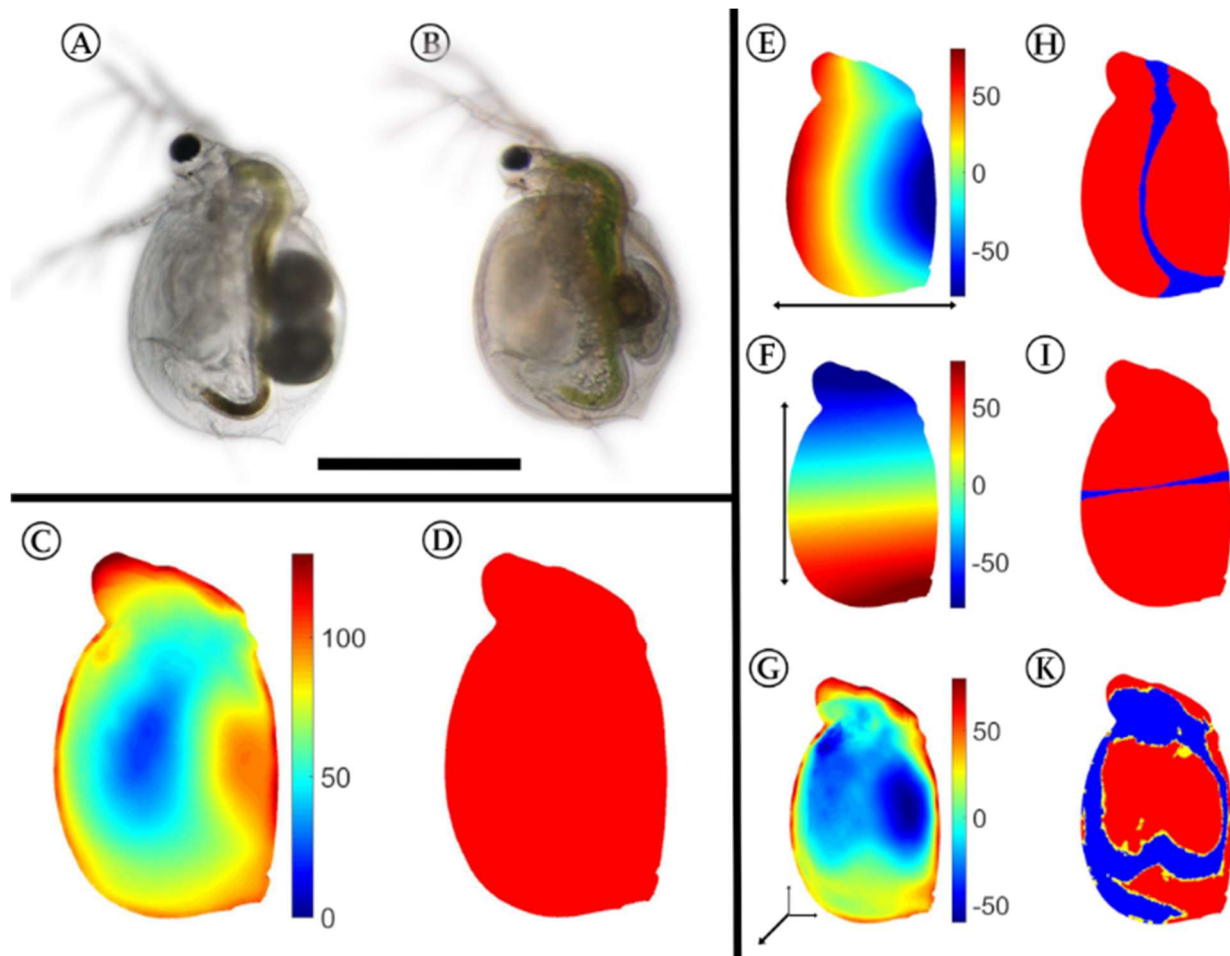

868

869

870 **Figure 3**

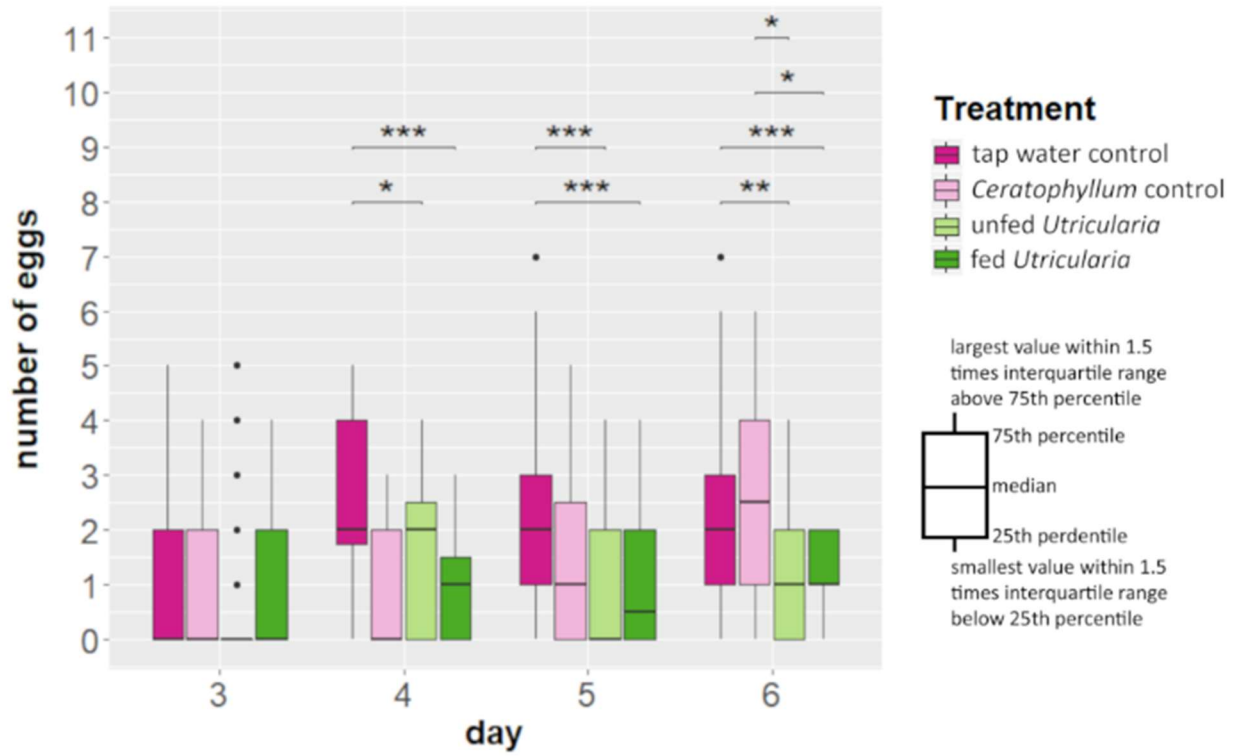

871

872 **Figure 4**

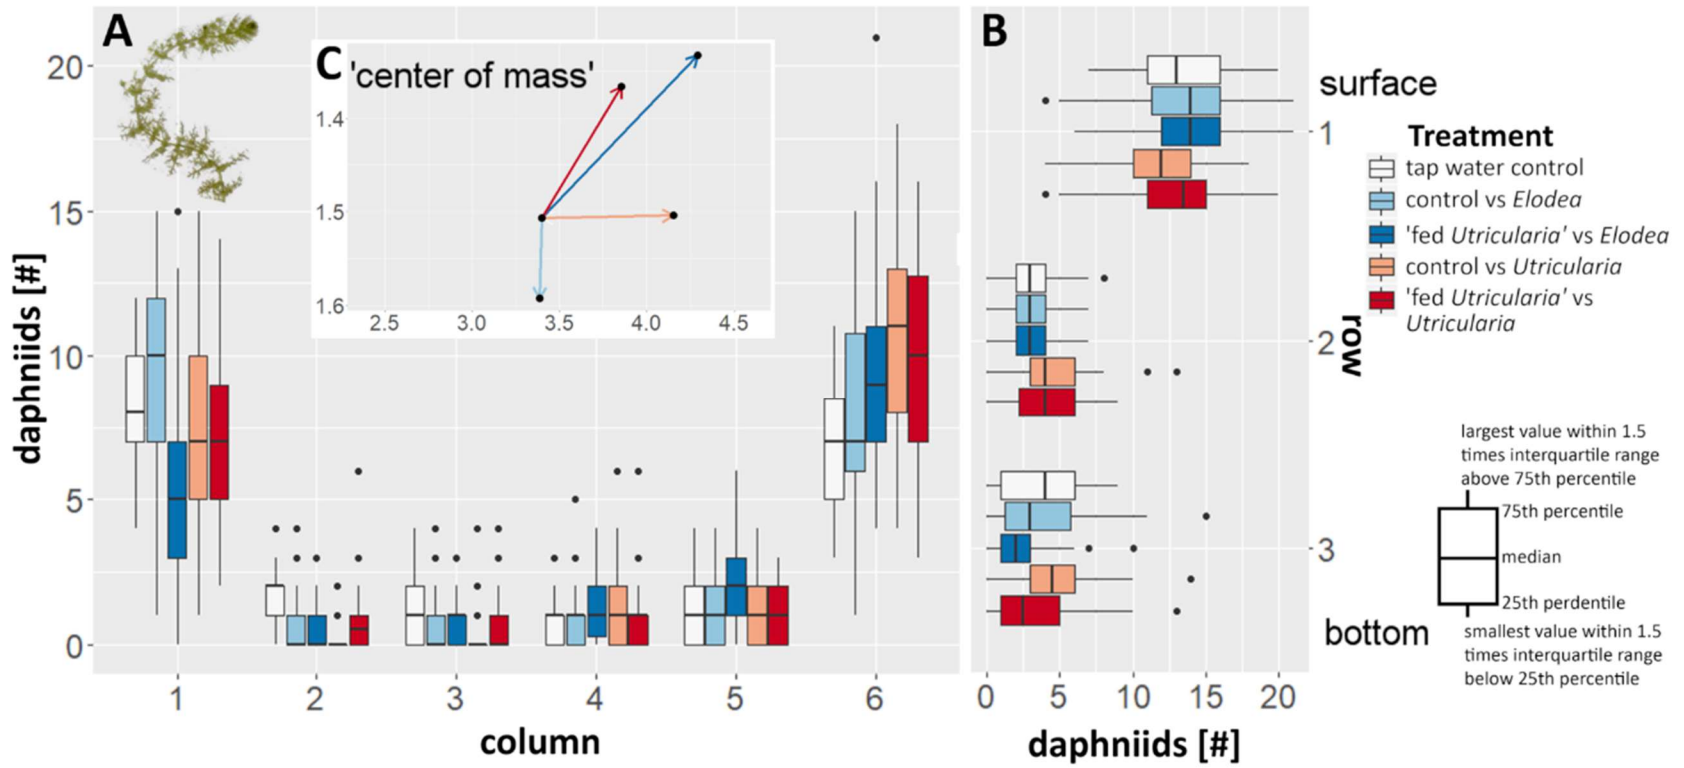

873

874



875 **Figure 5**

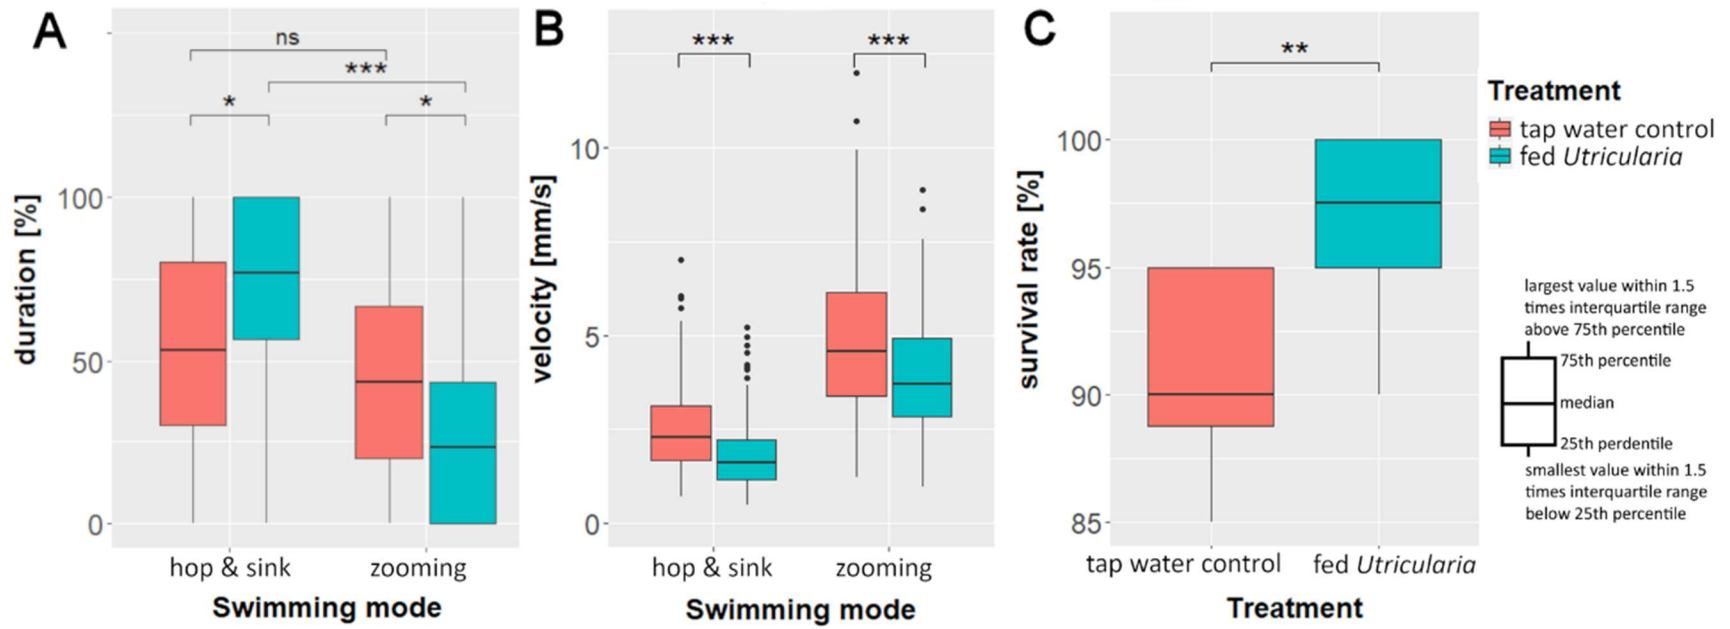

876
